# Supplementary material
Source: Elsevier journal article supplement (https://www.sciencedirect.com/science/article/pii/S0213005X22001343)
Supplement: mmc1 [file S0213005X22001343:mmc1.docx]

**Material adicional**

1. Primers usados para la secuenciación del gen 16S rARN:

- 27F: 5'-AGAGTTTGATCCTGGCTCAG-3'

- 533R: 5´-CTTGAGGCTCTGGTATCTTATTGC-3´

2. Protocolo de secuenciación del gen 16S rARN: el eluido se obtuvo mediante el sistema de extracción MagNA Pure Compact (Roche Diagnostic, Hoffman-La Roche, Basilea, Suiza). Se utilizaron 5 µl para la amplificación del gen 16S rRNA. Se utilizaron los cebadores 27F (5'-AGAGTTTGATCCTGGCTCAG-3') y 533-R (5'-CTTGAGGCTCTGGTATCTTATTGC-3'), que se unen en la región conservada, a una concentración de 50 µM con 10 µM de dNTP y 5 unidades/µM de Taq ADN polimerasa de Thermus aquaticus (Sigma-Aldrich, Misuri, EEUU). La PCR se realizó durante 1 ciclo inicial (94º C durante 5 min), seguido de 40 ciclos (94º C durante 1 min, 60º C durante 1 min, 72º C durante 1,5 min) y elongación final durante 10 min a 72º C. El producto de la PCR de 1,6 kb se comprobó y comparó con una cepa conocida de *Staphylococcus aureus* en un gel de agarosa al 1% y se obtuvo una secuencia de 463 pb.

2. Secuencia obtenida en la secuenciación del gen 16S rARN:

TCGAGGGGTAGGAGAGCTTGCTCTCCCTAGACCGGCGTACGGGTGCGTAACACGTGTACAATCTACCTTTTACTAAGGGATAGCCCGAAGAAATTTGGATTAATACCTTATAGTATTATTTTATGGCATCATTAAATAATTAAAGCTACGGTGGTAAAAGATGAGTACGCGTCCCATTAGCTAGTTGGAGTGGTAACGGCACACCAAGGCTACGATGGGTAGGGGTTCTGAGAGGGATGTCCCCCACACTGGTACTGAGACACGGACCAGACTCCTACGGGAGGCAGCAGTGAGGAATATTGGACAATGGTCGGAAGACTGATCCAGCCATGCCGCGTGCAGGATGACGGCCTTATGGGTTGTAAACTGCTTTTATACAGGAAGAATAAGGTCTACGAGTAGATTGATGACGGTACTGTATGAATAAGCATCGGCTAACTCCGTGCCAGCAGCCCGCGGTAAA

La secuencia fue introducida en BLASTR (Basic Local Alignment Search Tool) y tuvo una coincidencia del 99,57% con *Capnocytophaga canis.*
